# Supplementary material for: Chlorine-doped MoS2 quantum dots embedded in a molecularly imprinted polymer for highly selective and sensitive optosensing of quercetin
Source: Royal Society of Chemistry journal article supplement (doi:10.1039/d3ay01656k), 2023-12-12
Supplement: d3ay01656k1.pdf [file d3ay01656k1.pdf]

## **Supporting Information:**

### **Chlorine-Doped MoS<sub>2</sub> Quantum Dots Embedded in Molecularly Imprinted Polymer for Highly Selective and Sensitive Optosensing of Quercetin**

**Fengyi Wu\*, Jiliang Yang, Yousheng Ye, Rong Wu, Haiyan Wang**

Water environment research center, College of Chemistry and Material Engineering, Chaohu University, Hefei 238000, China

Water Environment Research Center, College of Chemistry and Material Engineering, Chaohu University, Hefei 238000, China; yangjiliang1984@126.com (J.Y.); yysheng@chu.edu.cn (Y.Y.); wurong@chu.edu.cn (R.W.); haiyan681108@163.com (H.W.)

\* Correspondence: wfy@chu.edu.cn; Tel.: +86-551-82362251

## Contents

|                                 |   |
|---------------------------------|---|
| Figure and Table.....           | 1 |
| The Stern-Volmer equation ..... | 5 |
| References .....                | 5 |

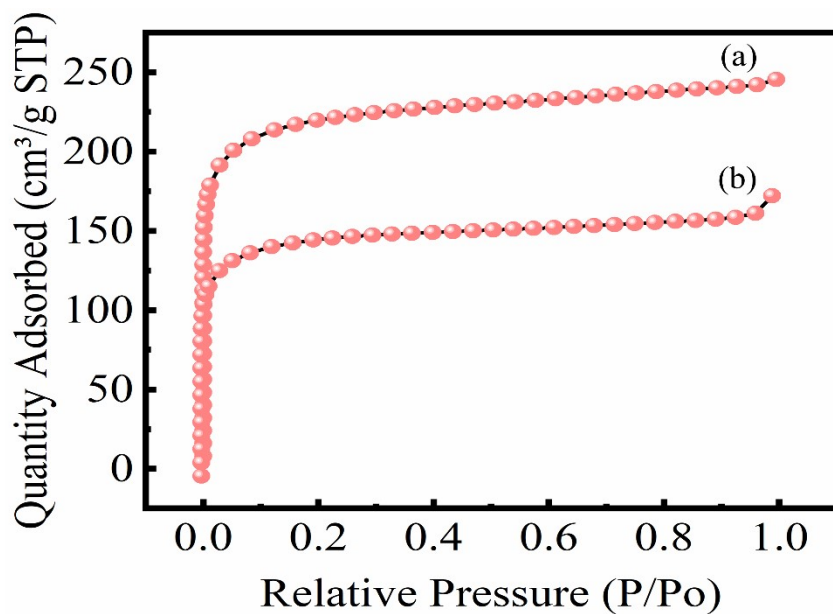

**Figure and Table :**

**Fig.S1** BET surface area of Cl-MoS<sub>2</sub> QDs @ SiO<sub>2</sub> @ QR (a) and Cl-MoS<sub>2</sub> QDs @ SiO<sub>2</sub> @ MIP(b)

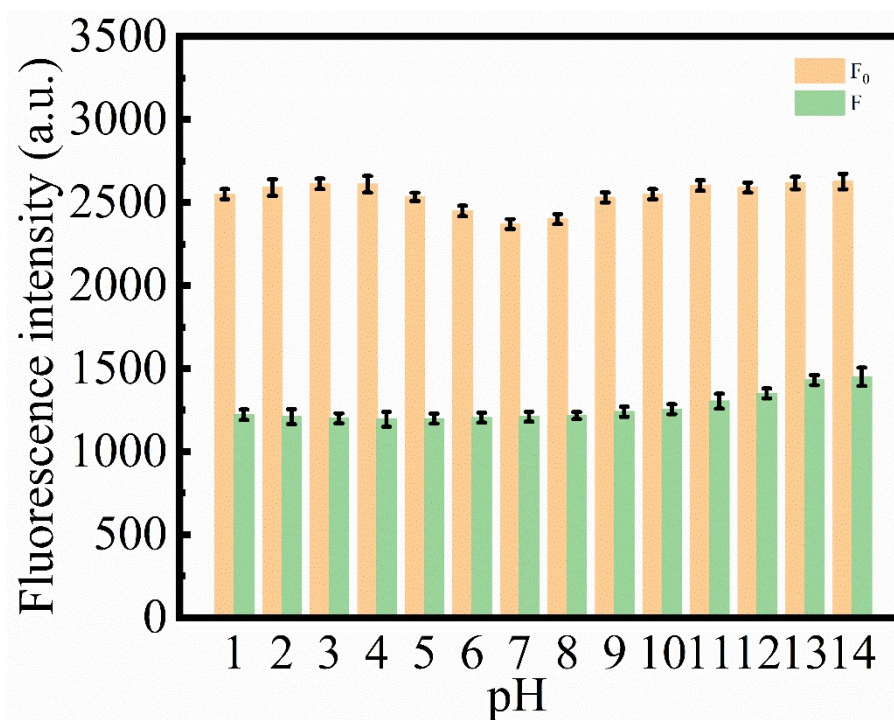

**Fig.S2** Fluorescence intensity of Cl-MoS<sub>2</sub> QDs @SiO<sub>2</sub>@ MIP with (F<sub>0</sub>) and without (F) the quercetin under different pH. The results show that the fluorescence intensity of Cl-MoS<sub>2</sub> QDs @SiO<sub>2</sub>@ MIP first decreases and then increases as the pH value increases. This fluorescence trend is related to the stability of Cl-MoS<sub>2</sub> QDs @SiO<sub>2</sub>@ MIP. In acidic and alkaline solutions, Cl-MoS<sub>2</sub> QDs @SiO<sub>2</sub>@ MIP has good stability ,thereby exhibiting relatively strong fluorescence. However, under alkaline conditions,

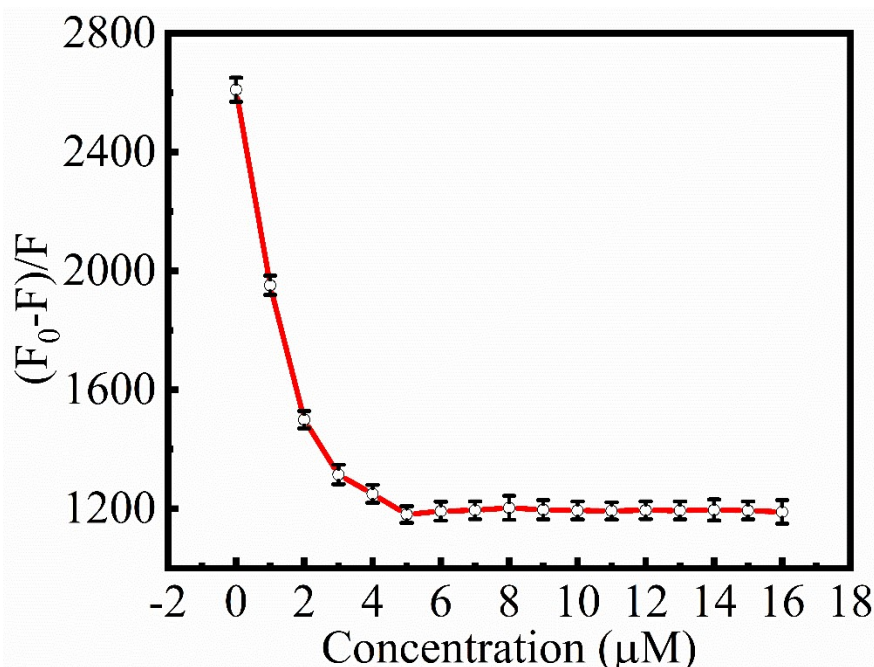

quercetin undergoes partial decomposition, which affects the reliability of testing results. Overall consideration, the optimal pH value is 4 for detection of quercetin using Cl-MoS<sub>2</sub> QDs @SiO<sub>2</sub>@ MIP sensor.

**Fig. S3** Effect of incubation time on fluorescence intensity of Cl-MoS<sub>2</sub> QDs@SiO<sub>2</sub>@ MIP. The results revealed a rapid and significant decrease in fluorescence intensity of Cl-MoS<sub>2</sub> QDs@SiO<sub>2</sub>@ MIP within a 5-minute interval upon addition of quercetin. Afterward, the fluorescence intensity of Cl-MoS<sub>2</sub> QDs@SiO<sub>2</sub>@ MIP remained relatively constant. As a result, the optimal incubation time for quercetin detection using Cl-MoS<sub>2</sub> QDs@SiO<sub>2</sub>@ MIP is determined to be 5 minutes.

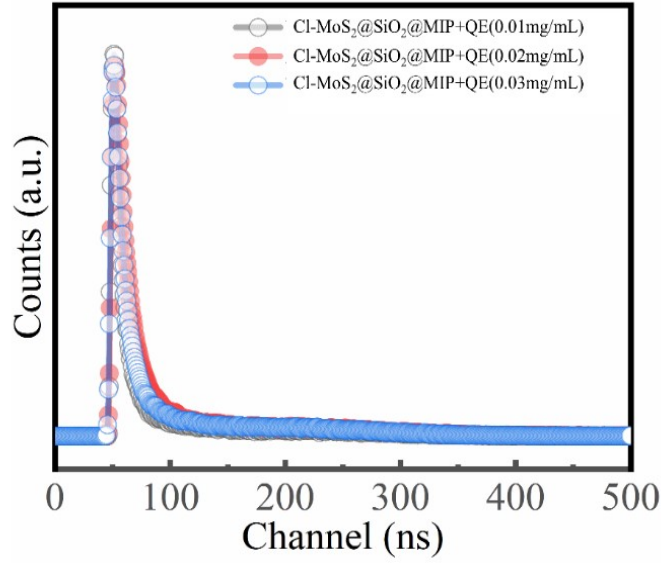

**Fig. S4** Transient photoluminescence spectra of Cl-MoS<sub>2</sub> QDs @ SiO<sub>2</sub> @ MIP with the addition of different concentrations quercetin (QR).

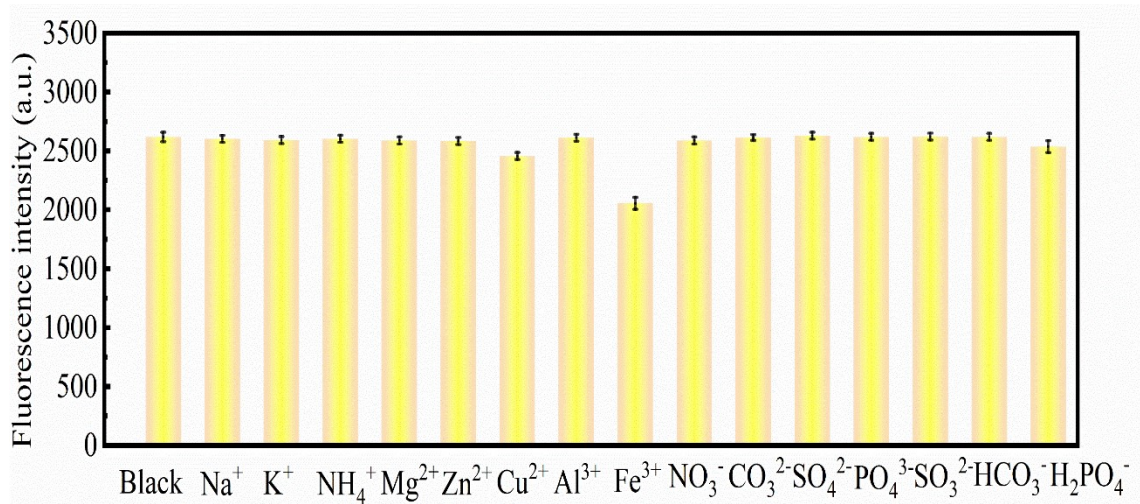

**Fig. S5** Fluorescence of the Cl-MoS<sub>2</sub> QDs @ SiO<sub>2</sub> @ MIP with diverse interfering ions.

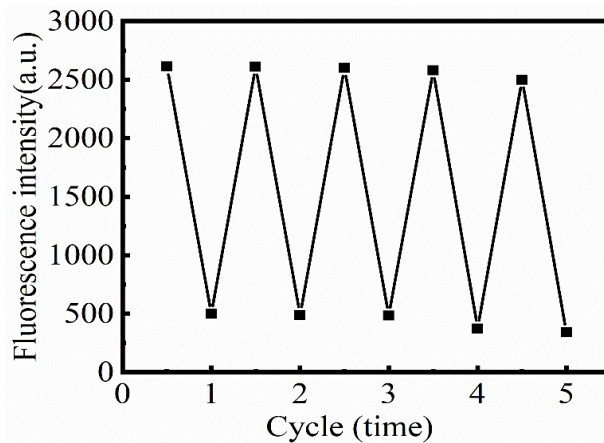

**Fig. S6** Recyclability test of quercetin with Cl-MoS<sub>2</sub> QDs @SiO<sub>2</sub>@ MIP. In order to reuse Cl-MoS<sub>2</sub> QDs @ SiO<sub>2</sub> @ MIP, the fluorescent probe was collected by centrifugation after the latest detection. Then, the obtained fluorescent probe was reflowed with acetone and vacuum dried for the next use.

**Table S1.** Detection of quercetin with different fluorescence sensors

| Material                                   | linear range   | LOD        | Recovery     | Referenc     |
|--------------------------------------------|----------------|------------|--------------|--------------|
| C QDs                                      | 0-40 μM        | 79 nM      |              | [1]          |
| Au QDs                                     | 0.089-180 μM   | 0.018 μM   |              | [2]          |
| Ag-Au QDs                                  | 0.9-100 μM     | 0.65 μM    |              | [3]          |
| CdSe/ZnS QDs                               | 0.576–184 mg/L | 0.14 mg/L  |              | [4]          |
| C NPs                                      | 3.3-41.2 μM    | 0.175 μM   |              | [5]          |
| C dots                                     | 1-47μM         | 172.4 nM   |              | [6]          |
| Ni-CQDs                                    | 0.5-300 μM     | 0.137 μM   | 97.3-101.9%  | [7]          |
| [Tb <sub>4</sub> ] MOF                     | 0–993 μM       | 0.76 μM    | -            | [8]          |
| C <sub>3</sub> N <sub>4</sub> QDs@MIP      | 10–1000 ng/mL  | 2.5 ng/mL  | 90.7-94.1%   | [9]          |
| C QDs@MOF@MIP                              | 0–50 μM        | 2.9 nM     |              | [10]         |
| N-C QDs                                    | 0.5-80 μg/mL   | 0.21 μg/mL |              | [11]         |
| MoS <sub>2</sub> QDs@SiO <sub>2</sub> @MIP | 2-200ng/mL     | 1.2 ng/mL  | 91.2%-104.2% | This is work |

**Table S2.** The structure formula of small organic molecules

| Chemicals        | molecular formula                              | structural formula                                                                   |
|------------------|------------------------------------------------|--------------------------------------------------------------------------------------|
| Quercetin (QE)   | C <sub>15</sub> H <sub>10</sub> O <sub>7</sub> | 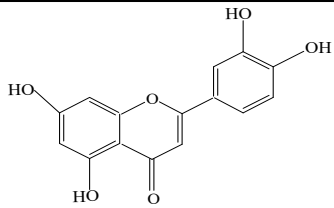 |
| Baicalein (BE)   | C <sub>15</sub> H <sub>10</sub> O <sub>5</sub> |  |
| Myricetin (ME)   | C <sub>15</sub> H <sub>10</sub> O <sub>8</sub> |  |
| Bisphenol C (BC) | C <sub>17</sub> H <sub>20</sub> O <sub>2</sub> |  |

|                      |                      |                                                                                    |
|----------------------|----------------------|------------------------------------------------------------------------------------|
| Daidzein (DE)        | $C_{15}H_{10}O_4$    | 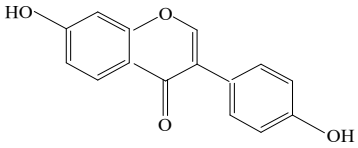 |
| Tetracycline (TC)    | $C_{22}H_{24}N_2O_8$ |  |
| Oxytetracycline (OC) | $C_{22}H_{24}O_9N_2$ |  |

### The Stern-Volmer equation:

$$\frac{F_0 - F}{F} = K_{SV}C_q = K_q\tau_0C_q,$$

where  $F_0$  and  $F$  are the fluorescence (FL) intensity of Cl-MoS<sub>2</sub> QDs @ SiO<sub>2</sub> @ MIP in the absence and presence of quercetin, respectively;  $C_q$  is the concentration of quercetin, and the dynamic quenching constant  $K_{sv}$  is  $4.79 \times 10^6$  (mol/L)<sup>-1</sup> by taking the slope of the regression line in Figure 6 (b). Here, term  $\tau_0$  is the average fluorescence lifetime of Cl-MoS<sub>2</sub> QDs @ SiO<sub>2</sub> @ MIP ( $\tau_0 = 8.10$  ns).

### References

1. Y. Zou, F. Y. Yan, T. C. Zheng, D. C. Shi, F. Z. Sun, N. Yang and L. Chen, *Talanta*, 2015, **135**, 145-148.
2. Z. G. Chen, S. H. Qian, J. H. Chen and X. Chen, *J. Nanopart. Res.*, 2012, **14**, 1-8.
3. Z. Chen, G. Zhang, X. Chen, J. Chen and Z. Fu, *Plasmonics*, 2013, **8**, 201-207.
4. W.-P. Hu, G.-D. Cao, W. Dong, H.-B. Shen, X.-H. Liu and L.-S. Li, *Anal. Methods*, 2014, **6**, 1442-1447.
5. P. L. Zuo, D. L. Xiao, M. M. Gao, J. Peng, R. F. Pan, Y. Xia and H. He, *Microchim.*

*Acta*, 2014, **181**, 1309-1316.

6. F. F. Du, S. M. Shuang, Z. H. Guo, X. J. Gong, C. Dong, M. Xian and Z. H. Yang, *Talanta*, 2020, **206**, 120243-120250.

7. Y.-F. Gao, X. Jin, F.-Y. Kong, Z.-X. Wang and W. Wang, *Analyst*, 2019, **144**, 7283-7289.

8. T.-Q. Song, K. Yuan, W.-Z. Qiao, Y. Shi, J. Dong, H.-L. Gao, X.-P. Yang, J.-Z. Cui and B. Zhao, *Anal. Chem.*, 2019, **91**, 2595-2599.

9. S. N. Xu, L.G. Chen and L. Ma, *Microchim. Acta*, 2018, **185**, 1-9.

10. L. H. Xu, M. F. Pan, G. Z. Fang and S. Wang, *Sens. Actuators, B-Chem.*, 2019, **286**, 321-327.

11. B. H. Gao, Y. Sun, Y. C. Miao, H.H. Min, L. Xu and C. B. Huang, *Aust. J. Chem.*, 2018, **71**, 882-889.
